# Supplementary material for: Identification of Divergent Isolates of Banana Mild Mosaic Virus and Development of a New Diagnostic Primer to Improve Detection
Source: MDPI journal article supplement (doi:10.3390/pathogens9121045), 2020-12-12
Supplement: s1 [file s1]

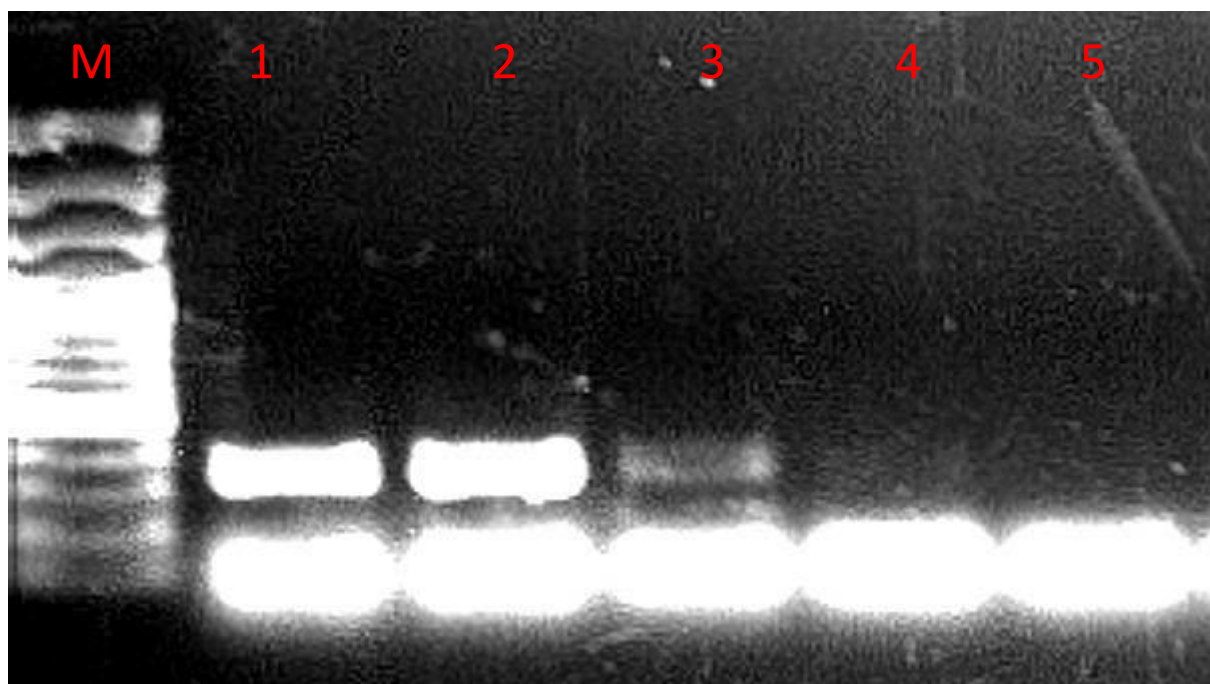

**Fig.** RT-PCR using BanMMV CP9 (and Poty1). M- Marker (100bp) ; Lanes 1 to 5 : ITC0763, ITC0763 (repetition), ITC1160, ITC1859 and healthy banana (negative control).
